# Supplementary material
Source: PubMed Central journal article supplement (PMC6843988)

**Supplementary Table 1:** Classification of Clinic Classification Software codes for Readmissions

## Causes

| Causes of readmission       | CCS code                                                                                                   | Diagnosis                                                       |
|-----------------------------|------------------------------------------------------------------------------------------------------------|-----------------------------------------------------------------|
| Respiratory                 | 127                                                                                                        | Chronic obstructive pulmonary disease and bronchiectasis        |
|                             | 128                                                                                                        | Asthma                                                          |
|                             | 130                                                                                                        | Pleurisy, pneumothorax, pulmonary collapse                      |
|                             | 131                                                                                                        | Respiratory failure, insufficiency and arrest                   |
|                             | 132                                                                                                        | Lung disease due to external agents                             |
|                             | 133                                                                                                        | Other lower respiratory disease                                 |
|                             | 134                                                                                                        | Other upper respiratory disease                                 |
|                             | 221                                                                                                        | Respiratory distress syndrome                                   |
| Infection                   | 1                                                                                                          | Tuberculosis                                                    |
|                             | 2                                                                                                          | Septicemia                                                      |
|                             | 3                                                                                                          | Bacterial infection                                             |
|                             | 4                                                                                                          | Mycoses                                                         |
|                             | 5                                                                                                          | HIV infection                                                   |
|                             | 6                                                                                                          | Hepatitis                                                       |
|                             | 7                                                                                                          | Viral infection                                                 |
|                             | 8                                                                                                          | Other infection                                                 |
|                             | 9                                                                                                          | Sexually transmitted infection                                  |
|                             | 76                                                                                                         | Meningitis                                                      |
|                             | 77                                                                                                         | Encephalitis                                                    |
|                             | 78                                                                                                         | Other CNS infection and poliomyelitis                           |
|                             | 90                                                                                                         | Inflammation or infection of eye                                |
|                             | 122                                                                                                        | Pneumonia                                                       |
|                             | 123                                                                                                        | Influenza                                                       |
|                             | 124                                                                                                        | Acute and chronic tonsillitis                                   |
|                             | 125                                                                                                        | Acute bronchitis                                                |
|                             | 126                                                                                                        | Other upper respiratory infections                              |
|                             | 129                                                                                                        | Aspiration pneumonitis                                          |
|                             | 135                                                                                                        | Intestinal infection                                            |
| 197                         | Skin and subcutaneous tissue infections                                                                    |                                                                 |
| 201                         | Infective arthritis and osteomyelitis (except that caused by tuberculosis or sexually transmitted disease) |                                                                 |
| Bleeding                    | 60                                                                                                         | Acute posthemorrhagic anemia                                    |
|                             | 153                                                                                                        | Gastrointestinal hemorrhage                                     |
|                             | 182                                                                                                        | Hemorrhage during pregnancy; abruptio placenta; placenta previa |
| Peripheral vascular disease | 114                                                                                                        | Peripheral and visceral atherosclerosis                         |
|                             | 115                                                                                                        | Aortic, peripheral and visceral artery aneurysms                |
|                             | 116                                                                                                        | Aortic and peripheral arterial embolism or thrombosis           |
|                             | 117                                                                                                        | Other circulatory disease                                       |
|                             | 118                                                                                                        | Phlebitis, thrombophlebitis and thromboembolism                 |
|                             | 119                                                                                                        | Varicose veins of lower extremities                             |
| Genitourinary               | 159                                                                                                        | Urinary tract infection                                         |
|                             | 160                                                                                                        | Calculus of the urinary tract                                   |

|                  |     |                                                    |
|------------------|-----|----------------------------------------------------|
|                  | 161 | Other diseases of kidney and ureters               |
|                  | 162 | Other diseases of bladder and urethra              |
|                  | 163 | Genitourinary symptoms and ill-defined conditions  |
|                  | 164 | Hyperplasia of prostate                            |
|                  | 165 | Inflammatory conditions of the male genital organs |
|                  | 166 | Other male genital disorders                       |
|                  | 170 | Prolapse of female genital organs                  |
|                  | 175 | Other female genital disorders                     |
|                  | 215 | Genitourinary congenital anomalies                 |
| Renal disease    | 156 | Nephritis; nephrosis; renal sclerosis              |
|                  | 157 | Acute and unspecified renal failure                |
|                  | 158 | Chronic kidney disease                             |
| Gastrointestinal | 138 | Esophageal disorders                               |
|                  | 139 | Gastroduodenal ulcer (except hemorrhage)           |
|                  | 140 | Gastritis and duodenitis                           |
|                  | 141 | Other disorders of stomach and duodenum            |
|                  | 142 | Appendicitis and other appendiceal conditions      |
|                  | 143 | Abdominal hernia                                   |
|                  | 144 | Regional enteritis and ulcerative colitis          |
|                  | 145 | Intestinal obstruction without hernia              |
|                  | 146 | Diverticulosis and diverticulitis                  |
|                  | 147 | Anal and rectal conditions                         |
|                  | 148 | Peritonitis and intestinal abscess                 |
|                  | 149 | Biliary tract disease                              |
|                  | 150 | Liver disease; alcohol-related                     |
|                  | 151 | Other liver diseases                               |
|                  | 152 | Pancreatic disorders (not diabetes)                |
|                  | 154 | Noninfectious gastroenteritis                      |
|                  | 155 | Other gastrointestinal disorders                   |
|                  | 214 | Digestive congenital anomalies                     |
|                  | 222 | Hemolytic jaundice and perinatal jaundice          |
|                  | 250 | Nausea and vomiting                                |
|                  | 251 | Abdominal pain                                     |
| TIA/stroke       | 109 | Acute cerebrovascular disease                      |
|                  | 110 | Occlusion of stenosis of precerebral arteries      |
|                  | 111 | Other and ill-defined cerebrovascular disease      |
|                  | 112 | Transient cerebral ischemia                        |
|                  | 113 | Late effects of cerebrovascular disease            |
| Trauma           | 207 | Pathological fracture                              |
|                  | 225 | Joint disorders and dislocations; trauma-related   |
|                  | 226 | Fracture of neck of femur (hip)                    |
|                  | 227 | Spinal cord injury                                 |
|                  | 228 | Skull and face fractures                           |
|                  | 229 | Fracture of upper limb                             |
|                  | 230 | Fracture of lower limb                             |
|                  | 231 | Other fractures                                    |

|                     |     |                                                                                              |
|---------------------|-----|----------------------------------------------------------------------------------------------|
|                     | 232 | Sprains and strains                                                                          |
|                     | 233 | Intracranial injury                                                                          |
|                     | 234 | Crushing injury or internal injury                                                           |
|                     | 235 | Open wounds of head; neck; and trunk                                                         |
|                     | 236 | Open wounds of extremities                                                                   |
|                     | 239 | Superficial injury; contusion                                                                |
|                     | 244 | Other injuries and conditions due to external causes                                         |
|                     | 260 | All (external causes of injury and poisoning)                                                |
| <hr/>               |     |                                                                                              |
| Endocrine/metabolic | 48  | Thyroid disorders                                                                            |
|                     | 49  | Diabetes mellitus without complication                                                       |
|                     | 50  | Diabetes mellitus with complication                                                          |
|                     | 51  | Other endocrine disorders                                                                    |
|                     | 53  | Disorders of lipid metabolism                                                                |
|                     | 58  | Other nutritional and endocrine/metabolic disorders                                          |
|                     | 186 | Diabetes or abnormal glucose tolerance complicating pregnancy; childbirth; or the puerperium |
| <hr/>               |     |                                                                                              |
| Neuropsychiatric    | 650 | Adjustment disorders                                                                         |
|                     | 651 | Anxiety disorders                                                                            |
|                     | 652 | Attention-deficit, conduct, and disruptive behavior disorders                                |
|                     | 653 | Delirium, dementia, and amnestic and other cognitive disorders                               |
|                     | 654 | Developmental disorders                                                                      |
|                     | 655 | Disorders usually diagnosed in infancy and childhood or adolescence                          |
|                     | 656 | Impulse control disorders, NEC                                                               |
|                     | 657 | Mood disorders                                                                               |
|                     | 658 | Personality disorders                                                                        |
|                     | 659 | Schizophrenia and other psychotic disorders                                                  |
|                     | 660 | Alcohol-related disorders                                                                    |
|                     | 661 | Substance-related disorders                                                                  |
|                     | 662 | Suicide and intentional self-inflicted injury                                                |
|                     | 663 | Screening and history of mental health and substance abuse codes                             |
|                     | 670 | Miscellaneous mental health disorders                                                        |
|                     | 79  | Parkinson's disease                                                                          |
|                     | 80  | Multiple sclerosis                                                                           |
|                     | 81  | Other hereditary and degenerative nervous system conditions                                  |
|                     | 82  | Paralysis                                                                                    |
|                     | 83  | Epilepsy, convulsions                                                                        |
|                     | 84  | Headache including migraine                                                                  |
|                     | 85  | Coma, stupor and brain damage                                                                |
|                     | 95  | Other nervous system disorders                                                               |
|                     | 216 | Nervous system congenital anomalies                                                          |
|                     | 650 | Adjustment disorders                                                                         |
|                     | 651 | Anxiety disorders                                                                            |
|                     | 652 | Attention-deficit, conduct, and disruptive behavior disorders                                |
|                     | 653 | Delirium, dementia, and amnestic and other cognitive disorders                               |
|                     | 654 | Developmental disorders                                                                      |
|                     | 655 | Disorders usually diagnosed in infancy and childhood or adolescence                          |

|                          |     |                                                                  |
|--------------------------|-----|------------------------------------------------------------------|
|                          | 656 | Impulse control disorders                                        |
|                          | 657 | Mood disorders                                                   |
|                          | 658 | Personality disorders                                            |
|                          | 659 | Schizophrenia and other psychotic disorders                      |
|                          | 660 | Alcohol-related disorders                                        |
|                          | 661 | Substance-related disorders                                      |
|                          | 662 | Suicide and intentional self-inflicted injury                    |
|                          | 663 | Screening and history of mental health and substance abuse codes |
|                          | 670 | Miscellaneous mental health disorders                            |
| <hr/>                    |     |                                                                  |
| Hematological/neoplastic | 11  | Cancer of head and neck                                          |
|                          | 12  | Cancer of esophagus                                              |
|                          | 13  | Cancer of stomach                                                |
|                          | 14  | Cancer of colon                                                  |
|                          | 15  | Cancer of rectum and anus                                        |
|                          | 16  | Cancer of liver and intrahepatic bile ducts                      |
|                          | 17  | Cancer of pancreas                                               |
|                          | 18  | Cancer of other gastrointestinal organs, peritoneum              |
|                          | 19  | Cancer of bronchus, lung                                         |
|                          | 20  | Cancer of other respiratory and intrathoracic                    |
|                          | 21  | Cancer of bone and connective tissue                             |
|                          | 22  | Melanoma of skin                                                 |
|                          | 23  | Other non-epithelial cancer of skin                              |
|                          | 24  | Cancer of breast                                                 |
|                          | 25  | Cancer of uterus                                                 |
|                          | 26  | Cancer of cervix                                                 |
|                          | 27  | Cancer of ovary                                                  |
|                          | 28  | Cancer of other female genital organs                            |
|                          | 29  | Cancer of prostate                                               |
|                          | 30  | Cancer of testis                                                 |
|                          | 31  | Cancer of other male genital organs                              |
|                          | 32  | Cancer of bladder                                                |
|                          | 33  | Cancer of kidney and renal pelvis                                |
|                          | 34  | Cancer of other urinary organs                                   |
|                          | 35  | Cancer of brain and nervous system                               |
|                          | 36  | Cancer of thyroid                                                |
|                          | 37  | Hodgkin's disease                                                |
|                          | 38  | Non-Hodgkin's lymphoma                                           |
|                          | 39  | Leukemias                                                        |
|                          | 40  | Multiple myeloma                                                 |
|                          | 41  | Cancer, other and unspecified primary                            |
|                          | 42  | Secondary malignancies                                           |
|                          | 43  | Malignant neoplasm without specification of site                 |
|                          | 44  | Neoplasm of unspecified nature or uncertain behavior             |
|                          | 46  | Benign neoplasm of uterus                                        |
|                          | 47  | Other and unspecified benign neoplasm                            |
|                          | 59  | Deficiency and other anemias                                     |

|                                         |     |                                                                         |
|-----------------------------------------|-----|-------------------------------------------------------------------------|
|                                         | 61  | Sickle cell anemia                                                      |
|                                         | 62  | Coagulation and hemorrhagic disorders                                   |
|                                         | 63  | Disease of white blood cells                                            |
|                                         | 64  | Other hematologic conditions                                            |
| Rheumatology problem                    | 54  | Gout and other crystal arthropathies                                    |
| Ophthalmology problem                   | 86  | Cataract                                                                |
|                                         | 87  | Retinal detachment defects, vascular occlusion and retinopathy          |
|                                         | 88  | Glaucoma                                                                |
|                                         | 89  | Blindness and vision defects                                            |
|                                         | 91  | Other eye disorders                                                     |
| ENT problem                             | 92  | Otitis media and related conditions                                     |
|                                         | 93  | Conditions associate with dizziness or vertigo                          |
|                                         | 94  | Other ear and sense organ disorder                                      |
| Non-specific chest pain                 | 102 | Non-specific chest pain                                                 |
| Oral health problem                     | 136 | Disorders of teeth and jaw                                              |
|                                         | 137 | Diseases of mouth; excluding dental                                     |
| Obstetric admission including pregnancy | 174 | Female infertility                                                      |
|                                         | 176 | Contraceptive and procreative management                                |
|                                         | 177 | Spontaneous abortion                                                    |
|                                         | 178 | Induced abortion                                                        |
|                                         | 179 | Postabortion complication                                               |
|                                         | 180 | Ectopic pregnancy                                                       |
|                                         | 181 | Other complications of pregnancy                                        |
|                                         | 184 | Early or threatened labor                                               |
|                                         | 185 | Prolonged pregnancy                                                     |
|                                         | 187 | Malposition; malpresentation                                            |
|                                         | 188 | Fetopelvic disproportion; obstruction                                   |
|                                         | 189 | Previous C-section                                                      |
|                                         | 190 | Fetal distress and abnormal forces of labor                             |
|                                         | 191 | Polyhydramnios and other problems of amniotic cavity                    |
|                                         | 192 | Umbilical cord complication                                             |
|                                         | 193 | OB-related trauma to perineum and vulva                                 |
|                                         | 194 | Forceps delivery                                                        |
|                                         | 195 | Other complications of birth; puerperium affecting management of mother |
|                                         | 196 | Other pregnancy and deliver including normal                            |
|                                         | 218 | Liveborn                                                                |
|                                         | 219 | Short gestation; low birth weight; and fetal growth retardation         |
|                                         | 220 | Intrauterine hypoxia and birth asphyxia                                 |
|                                         | 223 | Birth trauma                                                            |
|                                         | 224 | Other perinatal conditions                                              |
| Dermatology problem                     | 198 | Other inflammatory condition of skin                                    |
|                                         | 199 | Chronic ulcer of skin                                                   |
|                                         | 200 | Other skin disorders                                                    |
| Poisoning                               | 241 | Poisoning by psychotropic agents                                        |
|                                         | 242 | Poisoning by other medication and drugs                                 |
|                                         | 243 | Poisoning by nonmedical substances                                      |

|                     |     |                                                                                       |
|---------------------|-----|---------------------------------------------------------------------------------------|
| Syncope             | 245 | Syncope                                                                               |
| Other non-cardiac   | 10  | Immunization and screening for infectious disease                                     |
|                     | 45  | Maintenance chemotherapy, radiotherapy                                                |
|                     | 52  | Nutritional deficiencies                                                              |
|                     | 55  | Fluid and electrolyte disorders                                                       |
|                     | 56  | Cystic fibrosis                                                                       |
|                     | 57  | Immunity disorder                                                                     |
|                     | 120 | Hemorrhoids                                                                           |
|                     | 121 | Other diseases of veins and lymphatics                                                |
|                     | 167 | Nonmalignant breast conditions                                                        |
|                     | 168 | Inflammatory disease of female pelvic organs                                          |
|                     | 169 | Endometriosis                                                                         |
|                     | 172 | Ovarian cyst                                                                          |
|                     | 173 | Menopausal disorders                                                                  |
|                     | 202 | Rheumatoid arthritis and related disease                                              |
|                     | 203 | Osteoarthritis                                                                        |
|                     | 204 | Other non-traumatic joint disorders                                                   |
|                     | 205 | Spondylosis; intervertebral disc disorders; other back problems                       |
|                     | 206 | Osteoporosis                                                                          |
|                     | 208 | Acquired foot deformities                                                             |
|                     | 209 | Other acquired deformities                                                            |
|                     | 210 | Systemic lupus erythematosus and connective tissue disorders                          |
|                     | 211 | Other connective tissue disease                                                       |
|                     | 212 | Other bone disease and musculoskeletal deformities                                    |
|                     | 217 | Other congenital anomalies                                                            |
|                     | 237 | Complication of device; implant or graft                                              |
|                     | 238 | Complications of surgical procedure or medical care                                   |
|                     | 240 | Burns                                                                                 |
|                     | 246 | Fever of unknown origin                                                               |
|                     | 247 | Lymphadenitis                                                                         |
|                     | 248 | Gangrene                                                                              |
|                     | 252 | Malaise and fatigue                                                                   |
|                     | 253 | Allergic reactions                                                                    |
|                     | 254 | Rehabilitation care; fitting of prostheses; and adjustment of devices                 |
|                     | 255 | Administrative/social admission                                                       |
|                     | 256 | Medical examination/evaluation                                                        |
|                     | 257 | Other aftercare                                                                       |
|                     | 258 | Other screening for suspected conditions (not mental disorders or infectious disease) |
|                     | 259 | Residual codes; unclassified                                                          |
| Heart failure       | 108 | Congestive heart failure non-hypertensive                                             |
| Arrhythmia          | 106 | Cardiac dysrhythmias                                                                  |
|                     | 107 | Cardiac arrest and ventricular fibrillation                                           |
| Conduction disorder | 105 | Conduction disorders                                                                  |
| Valve disorders     | 96  | Heart valve disorder                                                                  |
| Hyper/hypotension   | 98  | Essential hypertension                                                                |
|                     | 99  | Hypertension with complications and secondary hypertension                            |

|                                          |     |                                                                    |
|------------------------------------------|-----|--------------------------------------------------------------------|
|                                          | 183 | Hypertension complicating pregnancy; childbirth and the puerperium |
|                                          | 249 | Shock                                                              |
| Pericarditis                             | 97  | Peri-, endo- and myocarditis, cardiomyopathy                       |
| Coronary artery disease including angina | 101 | Coronary atherosclerosis and other heart disease includes angina   |
| Acute myocardial infarction              | 100 | Acute myocardial infarction                                        |
| Others (cardiac)                         | 103 | Pulmonary heart disease                                            |
|                                          | 104 | Other and ill-defined heart disease                                |
|                                          | 213 | Cardiac and circulatory congenital anomalies                       |

**Supplementary Table 2:** Rates of unplanned readmissions within each timepoint (a) and cumulative rates (b) for acute coronary syndrome and stable ischemic heart disease cohorts.

(a)

| Group                                                                                                         | 0-7 day<br>(n=2,215,514) | 8-30 days<br>(n=2,161,213) | 31-90 days<br>(n=1,651,393) | 91-180 days<br>(n=1,023,324) |
|---------------------------------------------------------------------------------------------------------------|--------------------------|----------------------------|-----------------------------|------------------------------|
| No diagnosis of acute myocardial infarction readmissions                                                      | 26,620<br>(2.49%)        | 81,693<br>(7.85%)          | 80,871<br>(10.06%)          | 35,851<br>(9.24%)            |
| Diagnosis of acute myocardial infarction readmissions                                                         | 27,681<br>(2.41%)        | 83,210<br>(7.43%)          | 66,501<br>(7.85%)           | 46,046<br>(6.83%)            |
| Total readmitted                                                                                              | 54,301<br>(2.45%)        | 164,903<br>(7.63%)         | 147,372<br>(8.92%)          | 81,897<br>(8.00%)            |
| Total not readmitted                                                                                          | 2,161,213<br>(97.55%)    | 1,996,310<br>(92.37%)      | 1,504,021<br>(91.18%)       | 941,427<br>(92.00%)          |
| p-value for difference between acute myocardial infarction and not a diagnosis of acute myocardial infarction | 0.011                    | <0.001                     | <0.001                      | <0.001                       |

(b)

| Group                                                                                                         | 0-7 days<br>(n=2,215,514) | 0-30 days<br>(n=2,215,514) | 0-90 days<br>(n=1,834,667) | 0-180 days<br>(n=1,252,384) |
|---------------------------------------------------------------------------------------------------------------|---------------------------|----------------------------|----------------------------|-----------------------------|
| No diagnosis of acute myocardial infarction                                                                   | 26,620<br>(2.49%)         | 108,313<br>(10.14%)        | 172,332<br>(19.25%)        | 166,054<br>(26.84%)         |
| Diagnosis of acute myocardial infarction                                                                      | 27,681<br>(2.41%)         | 110,891<br>(9.66%)         | 158,313<br>(16.85%)        | 144,904<br>(22.86%)         |
| Total readmitted                                                                                              | 54,301<br>(2.45%)         | 219,204<br>(9.89%)         | 330,645<br>(18.02%)        | 310,958<br>(24.83%)         |
| Total not readmitted                                                                                          | 2,161,213<br>(97.55%)     | 1,996,310<br>(91.11%)      | 1,504,022<br>(81.98%)      | 941,426<br>(75.17%)         |
| p-value for difference between acute myocardial infarction and not a diagnosis of acute myocardial infarction | 0.011                     | <0.001                     | <0.001                     | <0.001                      |



**Supplementary Figure 1: Cost associated with unplanned readmissions at different time points**

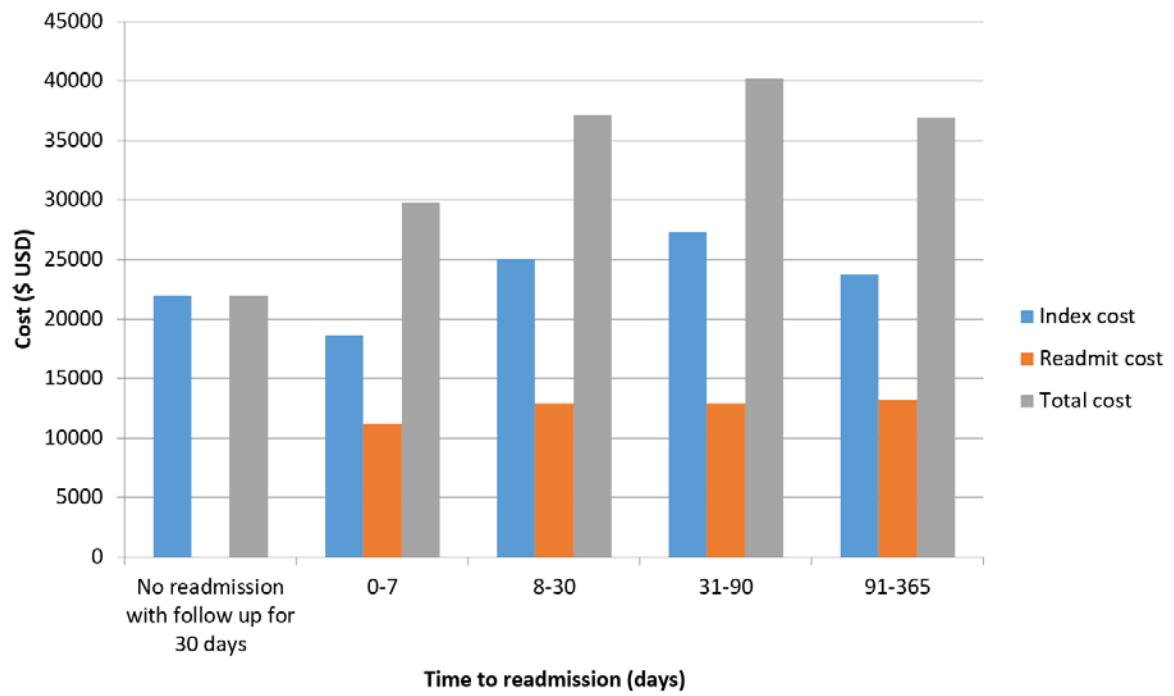

Supplement: NIHMS1056822-supplement-Supplemental.pdf [file NIHMS1056822-supplement-Supplemental.pdf]
